# Supplementary material for: Construction of a stable interface at the Na0.67Ni0.33Mn0.67O2 cathode using LiDFOB electrolyte additives for high-performance sodium-ion batteries
Source: Royal Society of Chemistry journal article supplement (doi:10.1039/d4ta04815f), 2024-01-01
Supplement: d4ta04815f1.pdf [file d4ta04815f1.pdf]

**Construction of a stable interface in the cathode of  $\text{Na}_{0.67}\text{Ni}_{0.33}\text{Mn}_{0.67}\text{O}_2$   
by LiDFOB electrolyte additives for high-performance sodium-ion  
batteries.**

Siyao Li, Hui Xu\*, Yuanqiang Zhu, Ziwei Yang, Yuanhai Bao, Yong Chen\*.  
*College of Petrochemical Technology, Lanzhou University of Technology, Lanzhou,  
730050, China.*

\*Corresponding author. Tel: +86—13639317927

E-mail address: xuhui@lut.edu.cn. yongchen2003@126.com

## Captions

**Table S1.** The HOMO and LUMO energy levels of EC, DEC, PF<sub>6</sub><sup>-</sup>, DFOB<sup>-</sup>.

**Table S2.** Contents of each component in the five groups of electrolytes.

**Table S3.** Fitting results of the equivalent circuit model.

**Fig. S1.** Linear sweep voltammetry (LSV) of NNMO // Na containing LiDFOB of different amounts during the initial cathodic scan from 2 to 4.2 V at a current density of 0.1 mA.

**Fig. S2.** The equivalent circuit model for impedance fitting.

**Fig. S3.** The GITT profiles of P2-NNMO (a) in baseline electrolyte and (b) electrolyte containing 0.8 wt% LiDFOB at the voltage range of 2 – 4.2 V.

**Fig. S4.** Fig. S4. (a) Initial charge / discharge curves at 0.1 C (b) Rate capability. (c) Cycling performance at 1 C of the NNMO//HC full cell.

**Fig. S5.** The XPS spectra of NNMO cathode with 0.8 wt% LiDFOB electrolyte of B 1s spectra in the half cell.

**Table S1.** The HOMO and LUMO energy levels of EC, DEC, PF<sub>6</sub><sup>-</sup>, DFOB<sup>-</sup>.

| <b>Molecule</b>              | <b>Structure</b>                                                                  | <b>E<sub>HOMO</sub>/eV</b> | <b>E<sub>LUMO</sub>/eV</b> |
|------------------------------|-----------------------------------------------------------------------------------|----------------------------|----------------------------|
| EC                           | 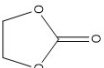 | -6.903                     | -0.295                     |
| DEC                          |  | -7.221                     | -0.090                     |
| PF <sub>6</sub> <sup>-</sup> |  | -0.12                      | 0.189                      |
| DFOB <sup>-</sup>            |  | -0.075                     | 0.057                      |

**Table S2.** Contents of each component in the five groups of electrolytes.

| No. | EC  | DEC | LiDFOB  | NaPF <sub>6</sub> |
|-----|-----|-----|---------|-------------------|
| D1  | 50% | 50% | 0.2 wt% | 1.0 M             |
| D2  | 50% | 50% | 0.4 wt% | 1.0 M             |
| D3  | 50% | 50% | 0.6 wt% | 1.0 M             |
| D4  | 50% | 50% | 0.8 wt% | 1.0 M             |
| D5  | 50% | 50% | 1.0 wt% | 1.0 M             |

**Table S3.** Fitting results of the equivalent circuit model

| Electrolyte |                     | 1 <sup>st</sup> | 10 <sup>th</sup> | 20 <sup>th</sup> | 30 <sup>th</sup> | 40 <sup>th</sup> |
|-------------|---------------------|-----------------|------------------|------------------|------------------|------------------|
| 0 wt%       | R <sub>CEI</sub> /Ω | 1260            | 1012             | 1309             | 1140             | 660.1            |
|             | R <sub>ct</sub> /Ω  | 174.8           | 555.1            | 535.5            | 470.2            | 763              |
| 0.2 wt%     | R <sub>CEI</sub> /Ω | 194.6           | 483.2            | 567              | 569.7            | 653              |
|             | R <sub>ct</sub> /Ω  | 3015            | 6238             | 15467            | 3887             | 4529             |
| 0.4 wt%     | R <sub>CEI</sub> /Ω | 179.4           | 344.4            | 394.3            | 213.9            | 89.28            |
|             | R <sub>ct</sub> /Ω  | 8276            | 8251             | 9442             | 2446             | 2588             |
| 0.6 wt%     | R <sub>CEI</sub> /Ω | 107.8           | 195.4            | 638.2            | 632.3            | 812.3            |
|             | R <sub>ct</sub> /Ω  | 9346            | 12366            | 3631             | 6395             | 7949             |
| 0.8 wt%     | R <sub>CEI</sub> /Ω | 7.936           | 82.38            | 147.1            | 124.8            | 126.2            |
|             | R <sub>ct</sub> /Ω  | 32100           | 4830             | 10809            | 2911             | 6019             |

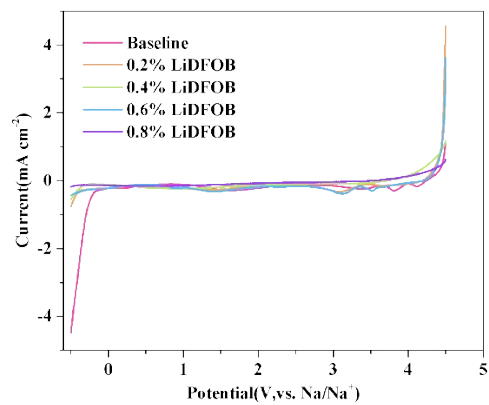

**Fig. S1.** Linear sweep voltammetry (LSV) of NNMO // Na containing LiDFOB of different amounts during the initial cathodic scan from 2 to 4.2 V at a current density of 0.1 mA.

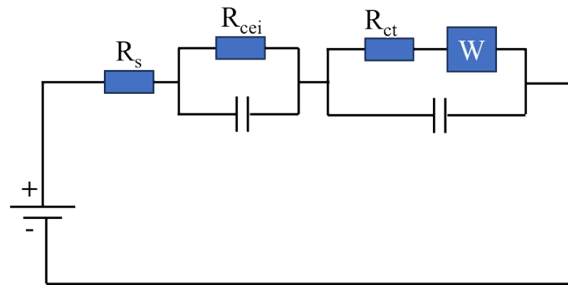

**Fig. S2.** The equivalent circuit model for impedance fitting

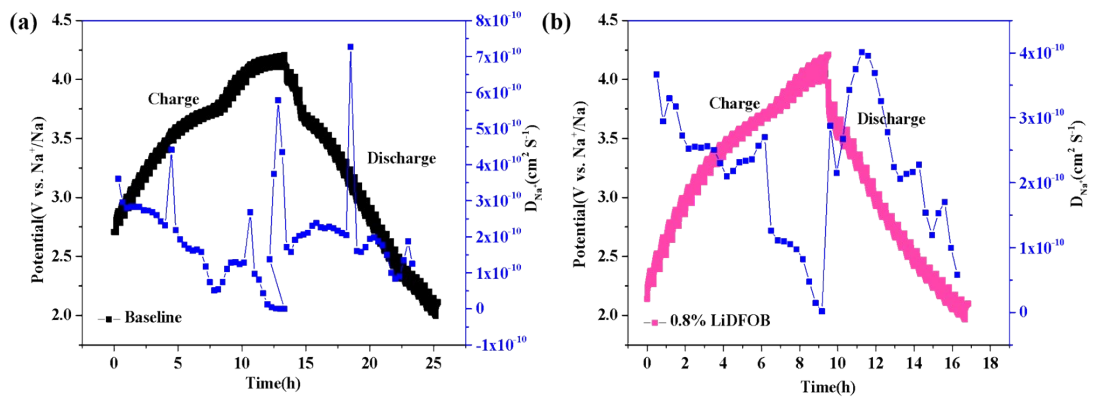

**Fig. S3.** The GITT profiles of P2-NNMO (a) in baseline electrolyte and (b) electrolyte containing 0.8wt% LiDFOB at the voltage range of 2 – 4.2 V.



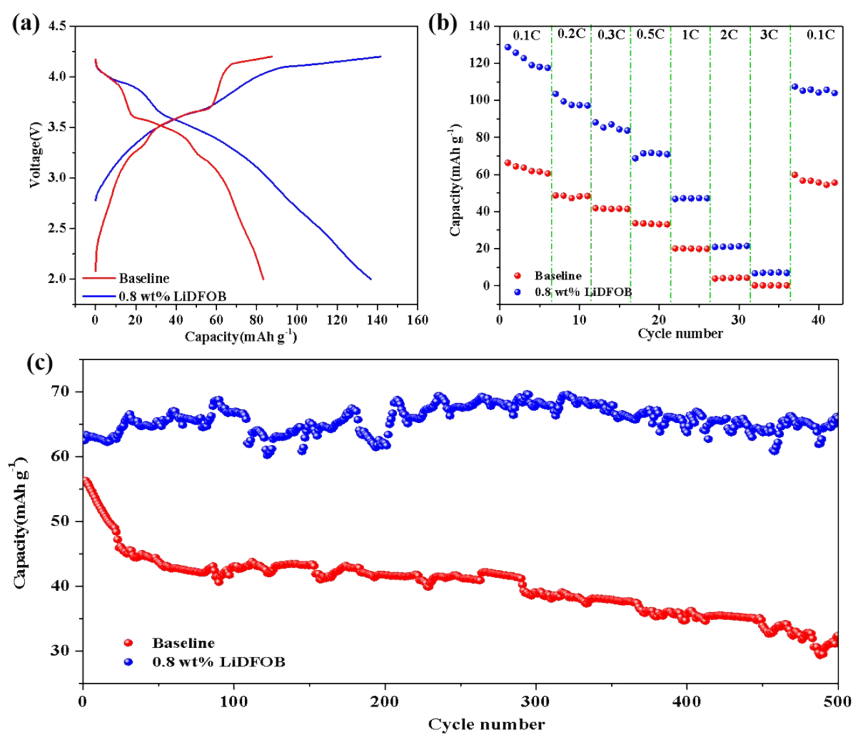

**Fig. S4.** (a) Initial charge / discharge curves at 0.1 C (b) Rate capability. (c) Cycling performance at 1 C of the NNMO//HC full cell.

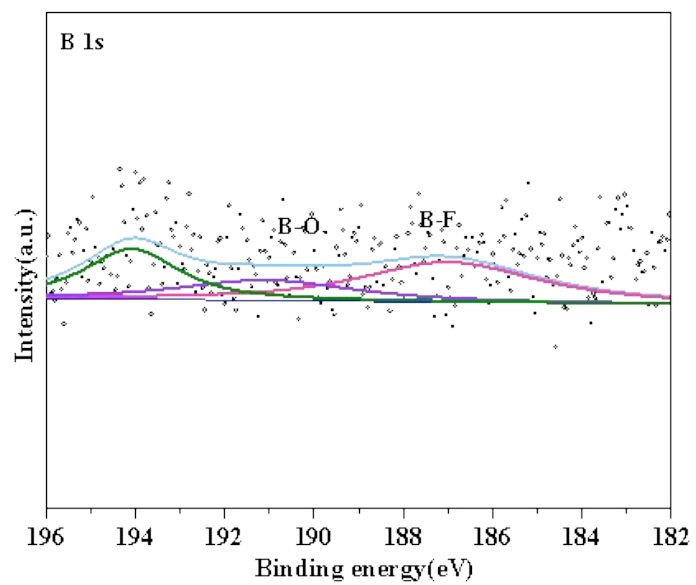

**Fig. S5.** The XPS spectra of NNMO cathode with 0.8 wt% LiDFOB electrolyte of B 1s spectra in the half cell.
